# Supplementary material
Source: publisher site journal article supplement (https://www.dovepress.com/article/534782)
Supplement: Supplementary file 1 [file Supplementary%20Materials%20534782_1.docx]

# Supplementary Material

**Supplementary Table 1**

Table 1 Clinicopathological features of 25 HCC patients

| Clinicopathological features | | Number of cases (n) |
| --- | --- | --- |
| Sex | Male | 22 |
| Female | 3 |
| Age | ≤ 55 years old | 9 |
| > 55 years old | 16 |
| HBV infection | Positive | 22 |
| Negative | 3 |
| Tumor number | Single | 22 |
| Multiple (≥2) | 3 |
| Tumor size | ≤ 5 cm | 17 |
| > 5 cm | 8 |
| TNM staging | I-II | 17 |
| III-IV | 8 |

**Note:** HBV, hepatitis B virus.

**Supplementary Figure 1**

**
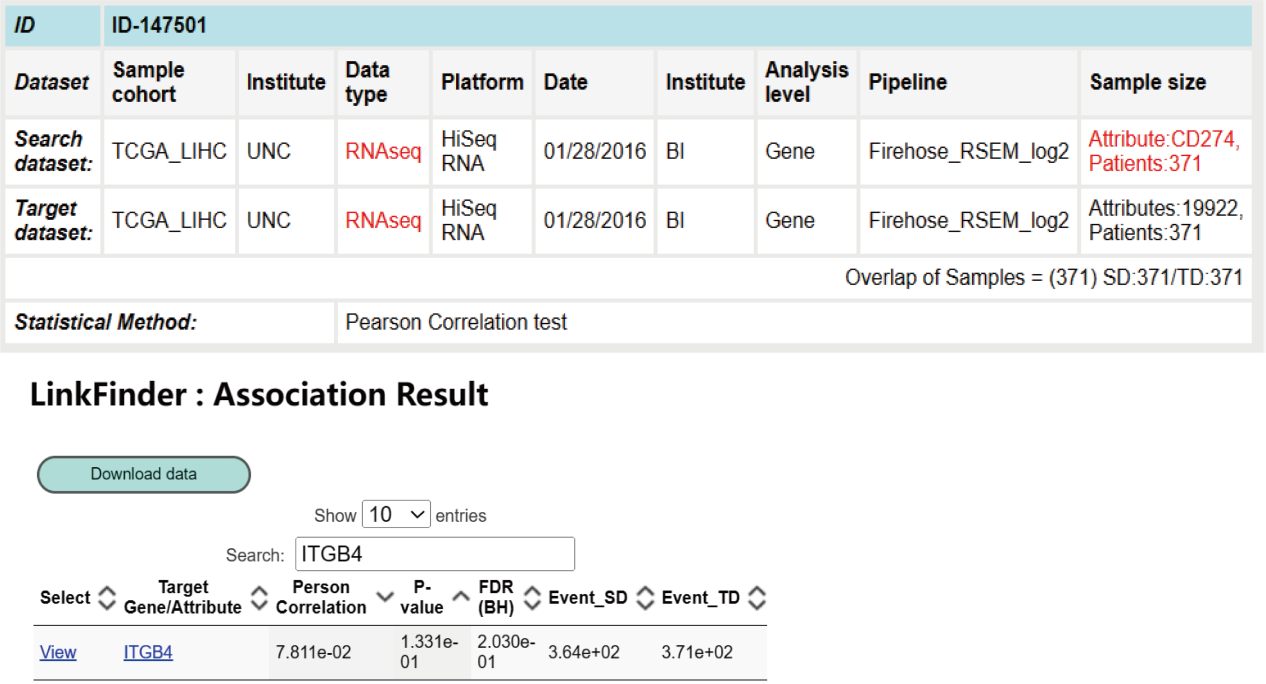
**

**Supplementary Figure 1.** Analysis of the correlation between PD-L1 and ITGB4 in the Linked Omics database (https://www.linkedomics.org/login.php).

**Supplementary Figure 2**


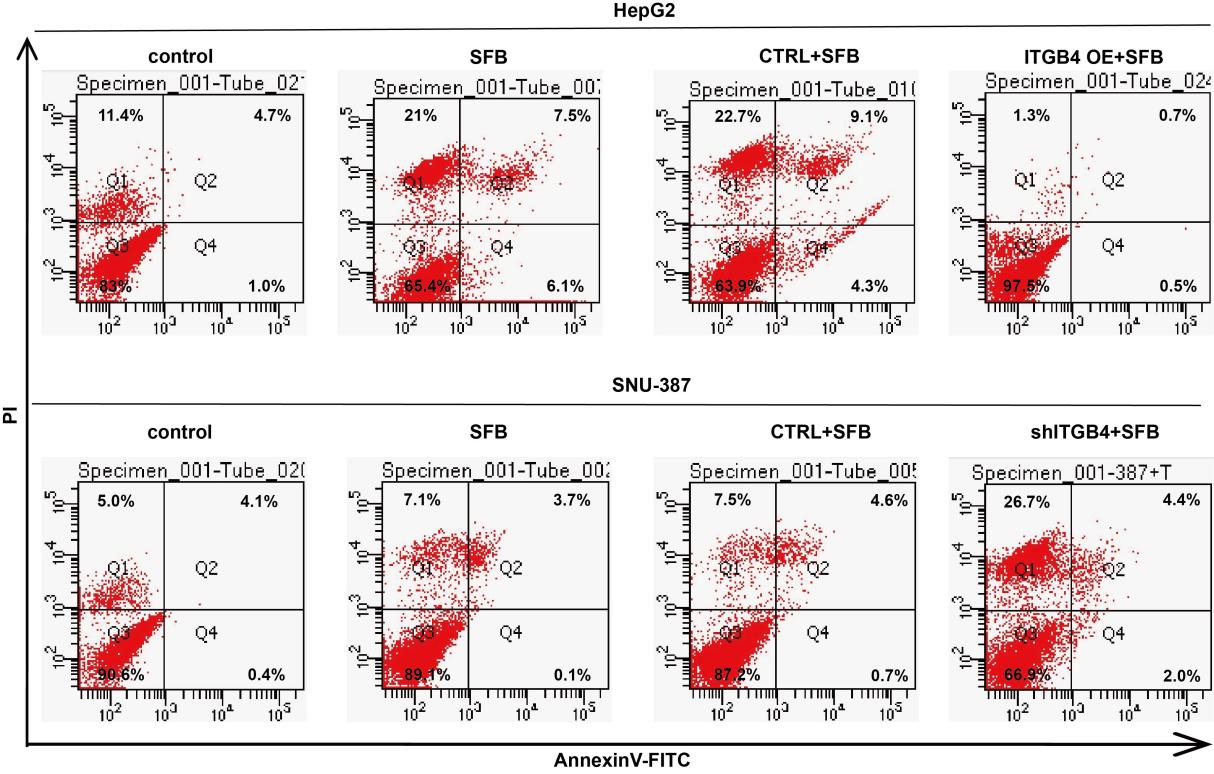


**Supplementary Figure 2.** Flow cytometry assessment of apoptotic ability of different cell groups post sorafenib treatment.

**Supplementary Figure 3**


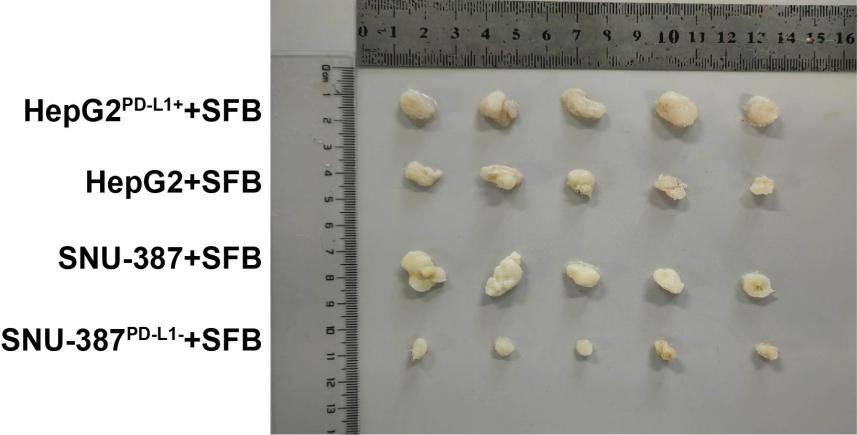


**Supplementary Figure 3.** HepG2, HepG2PD-L1+, SNU-387, and SNU-387PD-L1- terminal tumor solid image.
